# Supplementary material for: Newly Arrived Migrant Women’s Experience of Maternity Health Information: A Face-to-Face Questionnaire Study in Norway
Source: MDPI journal article supplement (doi:10.3390/ijerph18147523), 2021-07-15
Supplement: s1 [file s1]

| Offered professional interpreter<br>during pregnancy | Needed and got | Needed but did<br>not get | Did not need |
|------------------------------------------------------|----------------|---------------------------|--------------|
| Women's region of birth (GBD)                        |                |                           |              |
| Central/Eastern Europe and<br>Central Asia           | 27 (20.5)      | 22 (16.7)                 | 83 (62.9)    |
| Latin America and Caribbean                          | 2 (15.4)       | 3 (23.1)                  | 8 (61.5)     |
| North Africa and Middle East                         | 28 (36.8)      | 11 (14.5)                 | 37 (48.7)    |
| South Asia                                           | 10 (12.3)      | 13 (16.0)                 | 58 (71.6)    |
| Southeast Asia, East Asia and<br>Oceania             | 3 (8.1)        | 10 (27.0)                 | 24 (64.9)    |
| Sub-Saharan Africa                                   | 25 (40.3)      | 15(24.2)                  | 22 (35.5)    |
| Majority language proficiency                        |                |                           |              |
| Low                                                  | 41 (36.6)      | 22 (19.6)                 | 49 (43.8)    |
| Moderate                                             | 45 (26.0)      | 38 (22.0)                 | 90 (52.0)    |
| High                                                 | 9 (7.8)        | 14 (12.1)                 | 93 (80.2)    |
| Reason for migration                                 |                |                           |              |
| Refugee                                              | 17 (41.5)      | 11 (26.8)                 | 13 (31.7)    |
| Family reunification                                 | 53 (29.0)      | 33 (18.0)                 | 97 (53.0)    |
| Education/work                                       | 25 (14.1)      | 30 (16.9)                 | 122 (68.9)   |
| Financial level                                      |                |                           |              |
| Low                                                  | 26 (29.5)      | 28 (31.8)                 | 34 (38.6)    |
| High                                                 | 69 (22.0)      | 46 (14.7)                 | 198 (63.3)   |
| Education                                            |                |                           |              |
| No completed school                                  | 8 (50.0)       | 6 (37.5)                  | 2 (12.5)     |
| Primary/secondary school                             | 64 (42.4)      | 29 (19.2)                 | 58 (38.4)    |
| University                                           | 23 (9.8)       | 39 (16.7)                 | 172 (73.5)   |
| Employment                                           |                |                           |              |
| Unemployed                                           | 67 (38.7)      | 34 (19.7)                 | 72 (41.6)    |
| Employed                                             | 28 (12.3)      | 40 (17.5)                 | 160 (70.2)   |

**Table S1:** Characteristics of all study participants according to if the women needed and got an interpreter; needed but did not get an interpreter and those who did not need a professional interpreter, n (%)
