# Supplementary material for: Newly Arrived Migrant Women’s Experience of Maternity Health Information: A Face-to-Face Questionnaire Study in Norway
Source: Int J Environ Res Public Health. 2021 Jul 15;18(14):7523. doi: 10.3390/ijerph18147523 (PMC8307311; doi:10.3390/ijerph18147523)
Supplement: Supplementary file 1 [file ijerph-18-07523-s001.zip]

Archive with 5 entries (4 files):
- File S1.pdf
- Table S1.pdf
- __MACOSX/
- __MACOSX/._File S1.docx
- __MACOSX/._Table S2.docx
